# Supplementary material
Source: HighWire-hosted journal article supplement (https://erj.ersjournals.com/content/55/5/1902415)
Supplement: inline-supplementary-material-1 [file inline-supplementary-material-1.pdf]

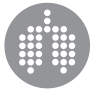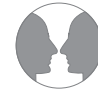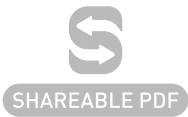

# Careful consideration of the bleeding caused by transbronchial lung cryobiopsies

Arnaud Bourdin<sup>1,2</sup>, Micaela Romagnoli<sup>3</sup>, Anne Sophie Gamez<sup>1</sup>, Kheira Hireche<sup>4</sup>, Jean Philippe Berthet<sup>4</sup>, Jean Pierre Mallet<sup>1</sup>, Isabelle Vachier<sup>1</sup>, Stefano Nava<sup>5</sup>, Paul Reynaud<sup>1</sup>, Nicolas Molinari<sup>6,7</sup> and Carey Suehs <sup>1,7</sup>

**Affiliations:** <sup>1</sup>Dept of Respiratory Diseases, Univ Montpellier, CHU Montpellier, Montpellier, France. <sup>2</sup>PhyMedExp, Univ Montpellier, CNRS, INSERM, CHU Montpellier, Montpellier, France. <sup>3</sup>Pulmonology Unit, Ospedale Ca' Foncello, AULSS2 Marca Trevigiana, Treviso, Italy. <sup>4</sup>Dept of Cardiac, Thoracic and Vascular Surgery, Univ Montpellier, CHU Montpellier, Montpellier, France. <sup>5</sup>Dept of Pulmonology, Univ Bologna, S. Orsola-Malpighi Hospital, Bologna, Italy. <sup>6</sup>IMAG, CNRS, Univ Montpellier, CHU Montpellier, Montpellier, France. <sup>7</sup>Dept of Medical Information, Univ Montpellier, CHU Montpellier, Montpellier, France.

**Correspondence:** Carey Suehs, Dept of Respiratory Diseases, Hôpital Arnaud de Villeneuve, 371 Av. du Doyen Gaston Giraud, F-34090 Montpellier, France. E-mail: careysuehs@protonmail.com

 @ERSpublications

**Lung surface photos show wounds/haemorrhages caused by transbronchial lung cryobiopsy (TBLC). TBLC bleeding can extensively soil airways with consequences for lung function, stressing the need for bleeding prevention and more research via registries.** <https://bit.ly/34wWAeR>

**Cite this article as:** Bourdin A, Romagnoli M, Gamez AS, *et al.* Careful consideration of the bleeding caused by transbronchial lung cryobiopsies. *Eur Respir J* 2020; 55: 1902415 [<https://doi.org/10.1183/13993003.02415-2019>].

This single-page version can be shared freely online.

*To the Editor:*

We read with great interest a research letter by PANNU *et al.* [1] in the *European Respiratory Journal* describing unexpected high mortality results in association with transbronchial lung cryobiopsy (TBLC). The team at Vanderbilt University Medical Center has decided to no longer provide TBLC for inpatients with acute diffuse parenchymal lung disease (DPLD) exacerbations, and spotlighted bleeding complications as a predictive factor for a higher risk of mortality for all patients [1].
